# Supplementary material
Source: Springer Nature journal article supplement (https://www.springermedizin.de/resource/supplementary/12993_2010_280_MOESM5_ESM.pdf/9617446)

## Humans (N=8)

### Square Shadow

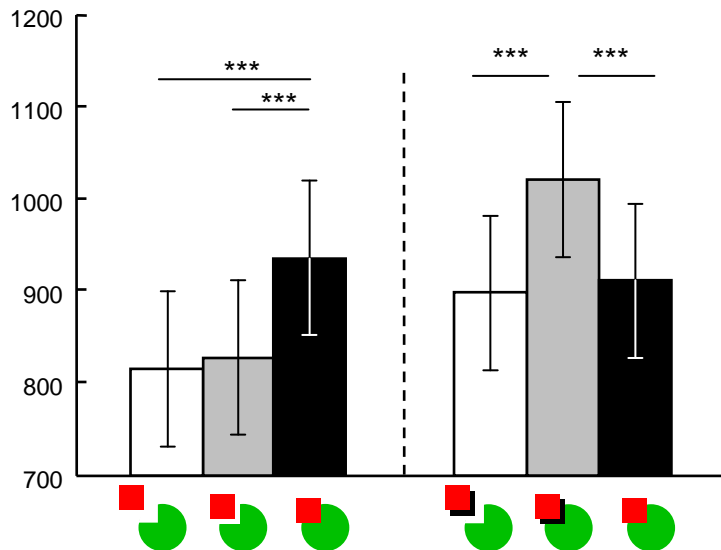

### Pacman Shadow

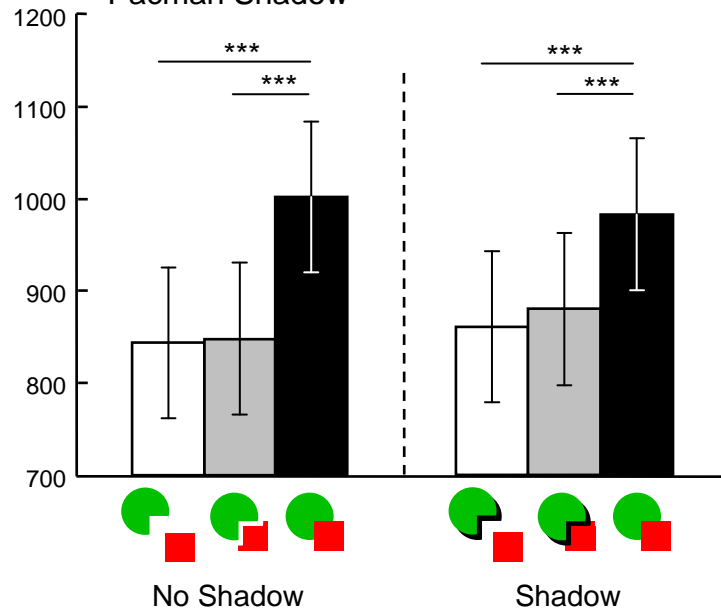

## Chimpanzees (N=4)

### Square Shadow

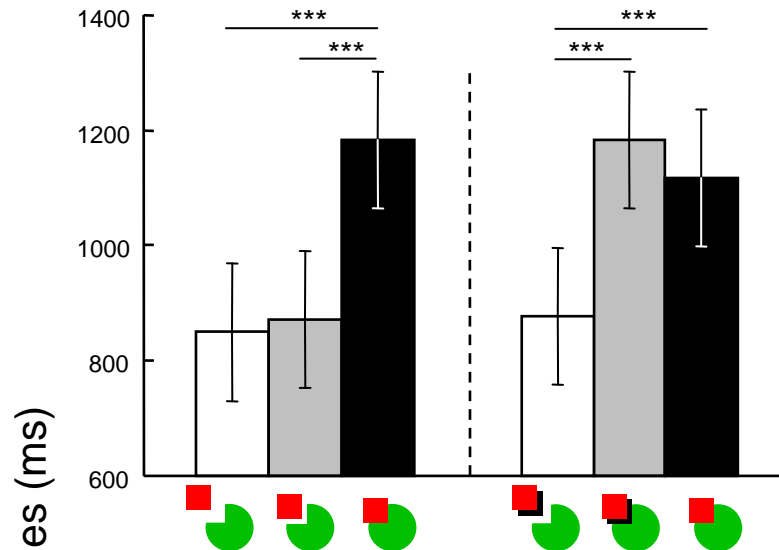

### Pacman Shadow

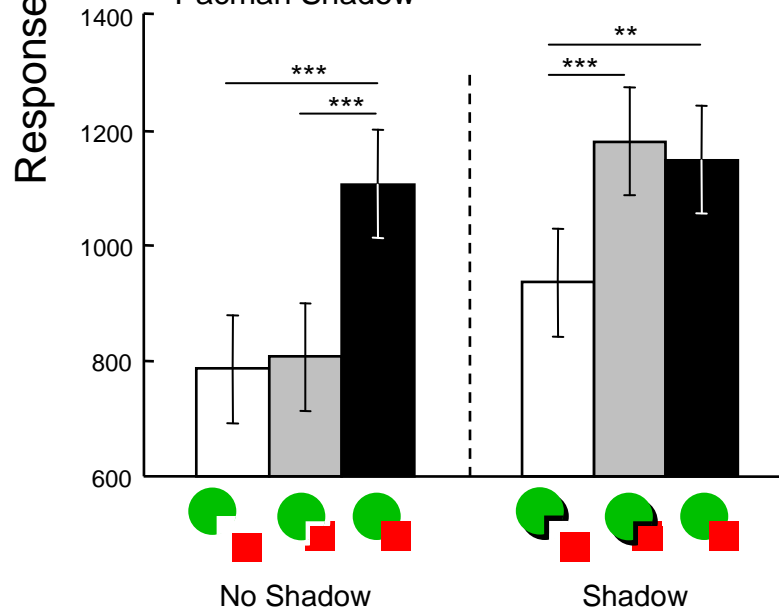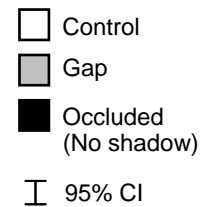

Supplement: MOESM5 [file 9617446]
